# Supplementary material
Source: ML conference proceedings conference paper supplement (https://proceedings.neurips.cc/paper_files/paper/2013/hash/41bfd20a38bb1b0bec75acf0845530a7-Abstract.html)
Supplement: Supplementary file [file 41bfd20a38bb1b0bec75acf0845530a7-Supplemental.zip]

## A Proof of Regret Decompositions

**Proposition 1.** Fix any sequence  $\{\mathcal{F}_t : t \in \mathbb{N}\}$ , where  $\mathcal{F}_t \subset \mathcal{F}$  is measurable with respect to  $\sigma(H_t)$ . Then for any  $T \in \mathbb{N}$ , with probability 1,

$$\mathcal{R}(T, \pi^{\mathcal{F}_{1:\infty}}) \leq \sum_{t=1}^T [w_{\mathcal{F}_t}(A_t) + C\mathbf{1}(f_\theta \notin \mathcal{F}_t)] \quad (7)$$

$$\mathbb{E}[\mathcal{R}(T, \pi^{\text{TS}})] \leq \mathbb{E} \sum_{t=1}^T [w_{\mathcal{F}_t}(A_t) + C\mathbf{1}(f_\theta \notin \mathcal{F}_t)]. \quad (8)$$

*Proof.* To reduce notation, define the upper and lower bounds  $U_t(a) = \sup\{f(a) : f \in \mathcal{F}_t\}$  and  $L_t(a) = \inf\{f(a) : f \in \mathcal{F}_t\}$ . Whenever  $f_\theta \in \mathcal{F}_t$ , the bounds  $L_t(a) \leq f_\theta(a) \leq U_t(a)$  hold for all actions. This implies

$$f_\theta(A_t^*) - f_\theta(A_t) \leq U_t(A_t^*) - L_t(A_t) + C\mathbf{1}(f_\theta \notin \mathcal{F}_t) \quad (9)$$

$$= w_{\mathcal{F}_t}(A_t) + C\mathbf{1}(f_\theta \notin \mathcal{F}_t) + [U_t(A_t^*) - U_t(A_t)]. \quad (10)$$

Equation (7) follows almost immediately, since the policy  $\pi^{\mathcal{F}_{1:\infty}}$  chooses an action  $A_t$  that maximizes  $U_t(a)$ . This implies  $U_t(A_t) \geq U_t(A_t^*)$  by definition, and the last term in (10) is negative. The result (7) follows by summing over  $t$ .

Now consider equation (8). Summing equation (10) over  $t$  shows,

$$\mathcal{R}(T, \pi^{\text{TS}}) \leq \sum_{t=1}^T [w_{\mathcal{F}_t}(A_t) + C\mathbf{1}(f_\theta \notin \mathcal{F}_t)] + M_T \quad (11)$$

where  $M_T := \sum_{t=1}^T [U_t(A_t^*) - U_t(A_t)]$ . Now, by the definition of Thompson sampling  $\mathbb{P}(A_t \in \cdot | H_t) = \mathbb{P}(A_t^* \in \cdot | H_t)$ . That is  $A_t$  and  $A_t^*$  are identically distributed under the posterior. In addition, since the confidence set  $\mathcal{F}_t$  is  $\sigma(H_t)$ -measurable, so is the induced upper confidence bound  $U_t(\cdot)$ . This implies  $\mathbb{E}[U_t(A_t) | H_t] = \mathbb{E}[U_t(A_t^*) | H_t]$ , and therefore that  $\mathbb{E}[M_T] = 0$ .  $\square$

## B Proof of Confidence bound

### B.1 Preliminaries: Martingale Exponential Inequalities

Consider random variables  $(Z_n | n \in \mathbb{N})$  adapted to the filtration  $(\mathcal{H}_n : n = 0, 1, \dots)$ . Assume  $\mathbb{E}[\exp\{\lambda Z_i\}]$  is finite for all  $\lambda$ . Define the conditional mean  $\mu_i = \mathbb{E}[Z_i | \mathcal{H}_{i-1}]$ . We define the conditional cumulant generating function of the centered random variable  $[Z_i - \mu_i]$  by  $\psi_i(\lambda) = \log \mathbb{E}[\exp(\lambda [Z_i - \mu_i]) | \mathcal{H}_{i-1}]$ . Let

$$M_n(\lambda) = \exp \left\{ \sum_{i=1}^n \lambda [Z_i - \mu_i] - \psi_i(\lambda) \right\}.$$

**Lemma 3.**  $(M_n(\lambda) | n \in \mathbb{N})$  is a Martingale, and  $\mathbb{E}[M_n(\lambda)] = 1$ .

*Proof.* By definition

$$\mathbb{E}[M_1(\lambda) | \mathcal{H}_0] = \mathbb{E}[\exp\{\lambda [Z_1 - \mu_1] - \psi_1(\lambda) | \mathcal{H}_0\}] = \mathbb{E}[\exp\{\lambda [Z_1 - \mu_1]\} | \mathcal{H}_0] / \exp\{\psi_1(\lambda)\} = 1.$$

Then, for any  $n \geq 2$ ,

$$\begin{aligned} \mathbb{E}[M_n(\lambda) | \mathcal{H}_{n-1}] &= \mathbb{E} \left[ \exp \left\{ \sum_{i=1}^{n-1} \lambda [Z_i - \mu_i] - \psi_i(\lambda) \right\} \exp \{ \lambda [Z_n - \mu_n] - \psi_n(\lambda) \} \mid \mathcal{H}_{n-1} \right] \\ &= \exp \left\{ \sum_{i=1}^{n-1} \lambda [Z_i - \mu_i] - \psi_i(\lambda) \right\} \mathbb{E}[\exp \{ \lambda [Z_n - \mu_n] - \psi_n(\lambda) \} \mid \mathcal{H}_{n-1}] \\ &= \exp \left\{ \sum_{i=1}^{n-1} \lambda [Z_i - \mu_i] - \psi_i(\lambda) \right\} = M_{n-1}(\lambda). \end{aligned}$$

$\square$

**Lemma 4.** For all  $x \geq 0$  and  $\lambda \geq 0$ ,  $\mathbb{P}(\sum_{i=1}^n \lambda Z_i \leq x + \sum_{i=1}^n [\lambda \mu_i + \psi_i(\lambda)] \mid \forall n \in \mathbb{N}) \geq 1 - e^{-x}$ .

*Proof.* For any  $\lambda$ ,  $M_n(\lambda)$  is a martingale with  $\mathbb{E}M_n(\lambda) = 1$ . Therefore, for any stopping time  $\tau$ ,  $\mathbb{E}[M_{\tau \wedge n}(\lambda)] = 1$ . For arbitrary  $x \geq 0$ , define  $\tau_x = \inf \{n \geq 0 \mid M_n(\lambda) \geq x\}$  and note that  $\tau_x$  is a stopping time corresponding to the first time  $M_n$  crosses the boundary at  $x$ . Then,  $\mathbb{E}[M_{\tau_x \wedge n}(\lambda)] = 1$  and by Markov's inequality:

$$x\mathbb{P}(M_{\tau_x \wedge n}(\lambda) \geq x) \leq \mathbb{E}M_{\tau_x \wedge n}(\lambda) = 1.$$

We note that the event  $\{M_{\tau_x \wedge n}(\lambda) \geq x\} = \bigcup_{k=1}^n \{M_k(\lambda) \geq x\}$ . So we have shown that for all  $x \geq 0$  and  $n \geq 1$

$$\mathbb{P}\left(\bigcup_{k=1}^n \{M_k(\lambda) \geq x\}\right) \leq \frac{1}{x}.$$

Taking the limit as  $n \rightarrow \infty$ , and applying the monotone convergence theorem shows  $\mathbb{P}(\bigcup_{k=1}^{\infty} \{M_k(\lambda) \geq x\}) \leq \frac{1}{x}$ . Or,  $\mathbb{P}(\bigcup_{k=1}^{\infty} \{M_k(\lambda) \geq e^x\}) \leq e^{-x}$ . This then shows, using the definition of  $M_k(\lambda)$ , that

$$\mathbb{P}\left(\bigcup_{n=1}^{\infty} \left\{\sum_{i=1}^n \lambda [Z_i - \mu_i] - \psi_i(\lambda) \geq x\right\}\right) \leq e^{-x}.$$

□

## B.2 Proof of Lemma 1

**Lemma 1.** For any  $\delta > 0$  and  $f : \mathcal{A} \mapsto \mathbb{R}$ ,

$$\mathbb{P}\left(L_{2,t}(f) \geq L_{2,t}(f_\theta) + \frac{1}{2}\|f - f_\theta\|_{2,E_t}^2 - 4\eta^2 \log(1/\delta) \quad \forall t \in \mathbb{N} \mid \theta\right) \geq 1 - \delta.$$

We will transform our problem in order to apply the general exponential martingale result shown above. since we work conditionally on  $\theta$ , to reduce notation we denote the conditional probability and expectation operators  $\mathbb{P}_\theta(\cdot) = \mathbb{P}(\cdot \mid \theta)$  and  $\mathbb{E}_\theta(\cdot) = \mathbb{E}(\cdot \mid \theta)$ . We set  $\mathcal{H}_{t-1}$  to be the  $\sigma$ -algebra generated by  $(H_t, A_t)$  and set  $\mathcal{H}_0 = \sigma(\emptyset, \Omega)$ . By previous assumptions,  $\epsilon_t := R_t - f_\theta(A_t)$  satisfies  $\mathbb{E}_\theta[\epsilon_t \mid \mathcal{H}_{t-1}] = 0$  and  $\mathbb{E}_\theta[\exp\{\lambda \epsilon_t\} \mid \mathcal{H}_{t-1}] \leq \exp\left\{\frac{\lambda^2 \eta^2}{2}\right\}$  a.s. for all  $\lambda$ . Define  $Z_t = (f_\theta(A_t) - R_t)^2 - (f(A_t) - R_t)^2$ .

*Proof.* By definition  $\sum_1^T Z_t = L_{2,T+1}(f_\theta) - L_{2,T+1}(f)$ . Some calculation shows that  $Z_t = -(f(A_t) - f_\theta(A_t))^2 + 2(f(A_t) - f_\theta(A_t))\epsilon_t$ . Therefore, the conditional mean and conditional cumulant generating function satisfy:

$$\begin{aligned} \mu_t &= \mathbb{E}_\theta[Z_t \mid \mathcal{H}_{t-1}] = -(f(A_t) - f_\theta(A_t))^2 \\ \psi_t(\lambda) &= \log \mathbb{E}_\theta[\exp(\lambda[Z_t - \mu_t]) \mid \mathcal{H}_{t-1}] \\ &= \log \mathbb{E}_\theta[\exp(2\lambda(f(A_t) - f_\theta(A_t))\epsilon_t) \mid \mathcal{H}_{t-1}] \leq \frac{(2\lambda[f(A_t) - f_\theta(A_t)])^2 \eta^2}{2} \end{aligned}$$

Applying Lemma 4 shows that for all  $x \geq 0, \lambda \geq 0$

$$\mathbb{P}_\theta\left(\sum_{k=1}^t \lambda Z_k \leq x - \lambda \sum_{k=1}^t (f(A_k) - f_\theta(A_k))^2 + \frac{\lambda^2}{2} (2f(A_k) - 2f_\theta(A_k))^2 \eta^2 \quad \forall t \in \mathbb{N}\right) \geq 1 - e^{-x}.$$

Or, rearranging terms

$$\mathbb{P}_\theta\left(\sum_{k=1}^t Z_k \leq \frac{x}{\lambda} + \sum_{k=1}^t (f(A_k) - f_\theta(A_k))^2 (2\lambda\eta^2 - 1) \quad \forall t \in \mathbb{N}\right) \geq 1 - e^{-x}.$$

Choosing  $\lambda = \frac{1}{4\eta^2}$ ,  $x = \log \frac{1}{\delta}$ , and using the definition of  $\sum_1^t Z_k$  implies

$$\mathbb{P}_\theta\left(L_{2,t}(f) \geq L_{2,t}(f_\theta) + \frac{1}{2}\|f - f_\theta\|_{2,E_t}^2 - 4\eta^2 \log(1/\delta) \quad \forall t \in \mathbb{N}\right) \geq 1 - \delta.$$

□

### B.3 Least Squares Bound - Proof of Proposition 2

**Proposition 2.** For all  $\delta > 0$  and  $\alpha > 0$ , if  $\mathcal{F}_t = \left\{ f \in \mathcal{F} : \|f - \hat{f}_t^{LS}\|_{2, E_t} \leq \sqrt{\beta_t^*(\mathcal{F}, \delta, \alpha)} \right\}$  for all  $t \in \mathbb{N}$ , then

$$\mathbb{P}_\theta \left( f_\theta \in \bigcap_{t=1}^{\infty} \mathcal{F}_t \right) \geq 1 - 2\delta.$$

*Proof.* Let  $\mathcal{F}^\alpha \subset \mathcal{F}$  be an  $\alpha$ -cover of  $\mathcal{F}$  in the sup-norm in the sense that for any  $f \in \mathcal{F}$  there exists  $f^\alpha \in \mathcal{F}^\alpha$  such that  $\|f^\alpha - f\|_\infty \leq \epsilon$ . By a union bound, conditional on  $\theta$ , with probability at least  $1 - \delta$ ,

$$L_{2,t}(f^\alpha) - L_{2,t}(f_\theta) \geq \frac{1}{2} \|f^\alpha - f_\theta\|_{2, E_t}^2 - 4\eta^2 \log(|\mathcal{F}^\alpha|/\delta) \quad \forall t \in \mathbb{N}, f \in \mathcal{F}^\alpha.$$

Therefore, with probability at least  $1 - \delta$ , for all  $t \in \mathbb{N}$  and  $f \in \mathcal{F}$ :

$$\begin{aligned} L_{2,t}(f) - L_{2,t}(f_\theta) &\geq \frac{1}{2} \|f - f_\theta\|_{2, E_t}^2 - 4\eta^2 \log(|\mathcal{F}^\alpha|/\delta) \\ &+ \underbrace{\min_{f^\alpha \in \mathcal{F}^\alpha} \left\{ \frac{1}{2} \|f^\alpha - f_\theta\|_{2, E_t}^2 - \frac{1}{2} \|f - f_\theta\|_{2, E_t}^2 + L_{2,t}(f) - L_{2,t}(f^\alpha) \right\}}_{\text{Discretization Error}}. \end{aligned}$$

Lemma 5, which we establish in the next section, asserts that with probability at least  $1 - \delta$  the discretization error is bounded for all  $t$  by  $\alpha D_t$  where  $D_t := t \left[ 8C + \sqrt{8\eta^2 \ln(4t^2/\delta)} \right]$ . Since the least squares estimate  $\hat{f}_t^{LS}$  has lower squared error than  $f_\theta$  by definition, we find with probability at least  $1 - 2\delta$

$$\frac{1}{2} \left\| \hat{f}_t^{LS} - f_\theta \right\|_{2, E_t}^2 \leq 4\eta^2 \log(|\mathcal{F}^\alpha|/\delta) + \alpha D_t.$$

Taking the infimum over the size of  $\alpha$  covers implies:

$$\left\| \hat{f}_t^{LS} - f_\theta \right\|_{2, E_t} \leq \sqrt{8\eta^2 \log(N(\mathcal{F}, \alpha, \|\cdot\|_\infty)/\delta) + 2\alpha D_t} \stackrel{\text{def}}{=} \sqrt{\beta_t^*(\mathcal{F}, \delta, \alpha)}.$$

□

### B.4 Discretization Error

**Lemma 5.** If  $f^\alpha$  satisfies  $\|f - f^\alpha\|_\infty \leq \alpha$ , then, conditional on  $\theta$ , with probability at least  $1 - \delta$ ,

$$\left| \frac{1}{2} \|f^\alpha - f_\theta\|_{2, E_t}^2 - \frac{1}{2} \|f - f_\theta\|_{2, E_t}^2 + L_{2,t}(f) - L_{2,t}(f^\alpha) \right| \leq \alpha t \left[ 8C + \sqrt{8\eta^2 \ln(4t^2/\delta)} \right] \quad \forall t \in \mathbb{N} \quad (12)$$

*Proof.* Since any two functions in  $\mathcal{F}$ ,  $f, f^\alpha \in \mathcal{F}$  satisfy  $\|f - f^\alpha\|_\infty \leq C$ , it is enough to consider  $\alpha \leq C$ . We find

$$\left| (f^\alpha)^2(a) - (f)^2(a) \right| \leq \max_{-\alpha \leq y \leq \alpha} |(f(a) + y)^2 - f(a)^2| = 2f(a)\alpha + \alpha^2 \leq 2C\alpha + \alpha^2$$

which implies

$$\begin{aligned} \left| (f^\alpha(a) - f_\theta(a))^2 - (f(a) - f_\theta(a))^2 \right| &= \left| [(f^\alpha(a))^2 - f(a)^2] + 2f_\theta(a)(f(a) - f^\alpha(a)) \right| \leq 4C\alpha + \alpha^2 \\ \left| (R_t - f(a))^2 - (R_t - f^\alpha(a))^2 \right| &= \left| 2R_t(f^\alpha(a) - f(a)) + f(a)^2 - f^\alpha(a)^2 \right| \leq 2\alpha |R_t| + 2C\alpha + \alpha^2 \end{aligned}$$

Summing over  $t$ , we find that the left hand side of (12) is bounded by

$$\sum_{k=1}^{t-1} \left( \frac{1}{2} [4C\alpha + \alpha^2] + [2\alpha |R_k| + 2C\alpha + \alpha^2] \right) \leq \alpha \sum_{k=1}^{t-1} (6C + 2|R_k|)$$

Because  $\epsilon_k$  is sub-Gaussian,  $\mathbb{P}_\theta \left( |\epsilon_k| > \sqrt{2\eta^2 \ln(2/\delta)} \right) \leq \delta$ . By a union bound,  $\mathbb{P}_\theta \left( \exists k \text{ s.t. } |\epsilon_k| > \sqrt{2\eta^2 \ln(4k^2/\delta)} \right) \leq \frac{\delta}{2} \sum_{k=1}^{\infty} \frac{1}{k^2} \leq \delta$ . Since  $|R_k| \leq C + |\epsilon_k|$  this shows that with probability at least  $1 - \delta$  the discretization error is bounded for all  $t$  by  $\alpha D_t$  where  $D_t := t \left[ 8C + 2\sqrt{2\eta^2 \ln(4t^2/\delta)} \right]$ . □

## C Bounding the sum of widths

**Proposition 3.** *If  $(\beta_t \geq 0 | t \in \mathbb{N})$  is a nondecreasing sequence and  $\mathcal{F}_t := \{f \in \mathcal{F} : \|f - \hat{f}_t^{LS}\|_{2, E_t} \leq \sqrt{\beta_t}\}$  then*

$$\sum_{t=1}^T \mathbf{1}(w_{\mathcal{F}_t}(A_t) > \epsilon) \leq \left( \frac{4\beta_T}{\epsilon^2} + 1 \right) \dim_E(\mathcal{F}, \epsilon)$$

for all  $T \in \mathbb{N}$  and  $\epsilon > 0$ .

*Proof.* We begin by showing that, for  $t \leq T$ , if  $w_t(A_t) > \epsilon$  then  $A_t$  is  $\epsilon$ -dependent on fewer than  $4\beta_T/\epsilon^2$  disjoint subsequences of  $(A_1, \dots, A_{t-1})$ . To see this, note that if  $w_{\mathcal{F}_t}(A_t) > \epsilon$  there are  $\bar{f}, \underline{f} \in \mathcal{F}_t$  such that  $\bar{f}(A_t) - \underline{f}(A_t) > \epsilon$ . By definition, since  $\bar{f}(A_t) - \underline{f}(A_t) > \epsilon$ , if  $A_t$  is  $\epsilon$ -dependent on a subsequence  $(A_{i_1}, \dots, A_{i_k})$  of  $(A_1, \dots, A_{t-1})$  then  $\sum_{j=1}^k (\bar{f}(A_{i_j}) - \underline{f}(A_{i_j}))^2 > \epsilon^2$ . It follows that, if  $A_t$  is  $\epsilon$ -dependent on  $K$  disjoint subsequences of  $(A_1, \dots, A_{t-1})$  then  $\|\bar{f} - \underline{f}\|_{2, E_t}^2 > K\epsilon^2$ . By the triangle inequality, we have

$$\|\bar{f} - \underline{f}\|_{2, E_t} \leq \|\bar{f} - \hat{f}_t^{LS}\|_{2, E_t} + \|\underline{f} - \hat{f}_t^{LS}\|_{2, E_t} \leq 2\sqrt{\beta_t} \leq 2\sqrt{\beta_T}.$$

and it follows that  $K < 4\beta_T/\epsilon^2$ .

Next, we show that in any action sequence  $(a_1, \dots, a_\tau)$ , there is some element  $a_j$  that is  $\epsilon$ -dependent on at least  $\tau/d - 1$  disjoint subsequences of  $(a_1, \dots, a_{j-1})$ , where  $d := \dim_E(\mathcal{F}, \epsilon)$ . To show this, for an integer  $K$  satisfying  $Kd + 1 \leq \tau \leq Kd + d$ , we will construct  $K$  disjoint subsequences  $B_1, \dots, B_K$ . First let  $B_i = (a_i)$  for  $i = 1, \dots, K$ . If  $a_{K+1}$  is  $\epsilon$ -dependent on each subsequence  $B_1, \dots, B_K$ , our claim is established. Otherwise, select a subsequence  $B_i$  such that  $a_{K+1}$  is  $\epsilon$ -independent and append  $a_{K+1}$  to  $B_i$ . Repeat this process for elements with indices  $j > K + 1$  until  $a_j$  is  $\epsilon$ -dependent on each subsequence or  $j = \tau$ . In the latter scenario  $\sum |B_i| \geq Kd$ , and since each element of a subsequence  $B_i$  is  $\epsilon$ -independent of its predecessors,  $|B_i| = d$ . In this case,  $a_\tau$  must be  $\epsilon$ -dependent on each subsequence, by the definition of  $\dim_E(\mathcal{F}, \epsilon)$ .

Now consider taking  $(a_1, \dots, a_\tau)$  to be the subsequence  $(A_{t_1}, \dots, A_{t_\tau})$  of  $(A_1, \dots, A_T)$  consisting of elements  $A_t$  for which  $w_{\mathcal{F}_t}(A_t) > \epsilon$ . As we have established, each  $A_{t_j}$  is  $\epsilon$ -dependent on fewer than  $4\beta_T/\epsilon^2$  disjoint subsequences of  $(A_1, \dots, A_{t_j-1})$ . It follows that each  $a_j$  is  $\epsilon$ -dependent on fewer than  $4\beta_T/\epsilon^2$  disjoint subsequences of  $(a_1, \dots, a_{j-1})$ . Combining this with the fact we have established that there is some  $a_j$  that is  $\epsilon$ -dependent on at least  $\tau/d - 1$  disjoint subsequences of  $(a_1, \dots, a_{j-1})$ , we have  $\tau/d - 1 \leq 4\beta_T/\epsilon^2$ . It follows that  $\tau \leq (4\beta_T/\epsilon^2 + 1)d$ , which is our desired result.  $\square$

**Lemma 2.** *If  $(\beta_t \geq 0 | t \in \mathbb{N})$  is a nondecreasing sequence and  $\mathcal{F}_t := \{f \in \mathcal{F} : \|f - \hat{f}_t^{LS}\|_{2, E_t} \leq \sqrt{\beta_t}\}$  then with probability 1,*

$$\sum_{t=1}^T w_{\mathcal{F}_t}(A_t) \leq \frac{1}{T} + \min \left\{ \dim_E(\mathcal{F}, \alpha_T^{\mathcal{F}}), T \right\} C + 4\sqrt{\dim_E(\mathcal{F}, \alpha_T^{\mathcal{F}}) \beta_T T} \quad (13)$$

for all  $T \in \mathbb{N}$ .

*Proof.* To reduce notation, write  $d = \dim_E(\mathcal{F}, \alpha_T^{\mathcal{F}})$  and  $w_t = w_t(A_t)$ . Reorder the sequence  $(w_1, \dots, w_T) \rightarrow (w_{i_1}, \dots, w_{i_T})$  where  $w_{i_1} \geq w_{i_2} \geq \dots \geq w_{i_T}$ . We have

$$\sum_{t=1}^T w_{\mathcal{F}_t}(A_t) = \sum_{t=1}^T w_{i_t} = \sum_{t=1}^T w_{i_t} \mathbf{1} \{w_{i_t} \leq \alpha_T^{\mathcal{F}}\} + \sum_{t=1}^T w_{i_t} \mathbf{1} \{w_{i_t} > \alpha_T^{\mathcal{F}}\} \leq \frac{1}{T} + \sum_{t=1}^T w_{i_t} \mathbf{1} \{w_{i_t} > \alpha_T^{\mathcal{F}}\}.$$

The final step in the above inequality uses that either  $\alpha_T^{\mathcal{F}} = T^{-2}$  and  $\sum_{t=1}^T \alpha_T^{\mathcal{F}} = T^{-1}$  or  $\alpha_T^{\mathcal{F}}$  is set below the smallest possible width and hence  $\mathbf{1} \{w_{i_t} \leq \alpha_T^{\mathcal{F}}\}$  never occurs.

Now, we know  $w_{i_t} \leq C$ . In addition,  $w_{i_t} > \epsilon \iff \sum_{k=1}^T \mathbf{1}(w_{\mathcal{F}_k}(A_k) > \epsilon) \geq t$ . By Proposition 3, this can only occur if  $t < \left( \frac{4\beta_T}{\epsilon^2} + 1 \right) \dim_E(\mathcal{F}, \epsilon)$ . For  $\epsilon \geq \alpha_T^{\mathcal{F}}$ ,  $\dim_E(\mathcal{F}, \epsilon) \leq \dim_E(\mathcal{F}, \alpha_T^{\mathcal{F}}) = d$ , since  $\dim_E(\mathcal{F}, \epsilon')$  is nonincreasing in  $\epsilon'$ . Therefore, when  $w_{i_t} > \epsilon \geq \alpha_T^{\mathcal{F}}$ ,  $t \leq \left( \frac{4\beta_T}{\epsilon^2} + 1 \right) d$  which implies  $\epsilon \leq \sqrt{\frac{4\beta_T d}{t-d}}$ . This shows that if  $w_{i_t} > \alpha_T^{\mathcal{F}}$ , then  $w_{i_t} \leq \min \left\{ C, \sqrt{\frac{4\beta_T d}{t-d}} \right\}$ . Therefore,

$$\sum_{t=1}^T w_{i_t} \mathbf{1} \{w_{i_t} > \alpha_T^{\mathcal{F}}\} \leq dC + \sum_{t=d+1}^T \sqrt{\frac{4d\beta_T}{t-d}} \leq dC + 2\sqrt{d\beta_T} \int_{t=0}^T \frac{1}{\sqrt{t}} dt = dC + 4\sqrt{d\beta_T T}.$$

To complete the proof, we combine this with the fact that the sum of widths is always bounded by  $CT$ . This implies:

$$\begin{aligned} \sum_{t=1}^T w_{\mathcal{F}_t}(A_t) &\leq \min \left\{ TC, \frac{1}{T} + \dim_E(\mathcal{F}, \alpha_T^{\mathcal{F}}) C, +4\sqrt{\dim_E(\mathcal{F}, \alpha_T^{\mathcal{F}}) \beta_T T} \right\} \\ &\leq \frac{1}{T} + \min \left\{ \dim_E(\mathcal{F}, \alpha_T^{\mathcal{F}}) C, TC \right\} + 4\sqrt{\dim_E(\mathcal{F}, \alpha_T^{\mathcal{F}}) \beta_T T} \end{aligned}$$

□

## D Bounds on Eluder Dimension for Common Function Classes

Definition 4, which defines the eluder dimension of a class of functions, can be equivalently written as follows. The  $\epsilon$ -eluder dimension of a class of functions  $\mathcal{F}$  is the length of the longest sequence  $a_1, \dots, a_\tau$  such that for some  $\epsilon' \geq \epsilon$

$$w_k := \sup \left\{ (f_{\rho_1} - f_{\rho_2})(a_k) : \sqrt{\sum_{i=1}^{k-1} (f_{\rho_1} - f_{\rho_2})^2(a_i)} \leq \epsilon', \rho_1, \rho_2 \in \Theta \right\} > \epsilon' \quad (14)$$

for each  $k \leq \tau$ .

### D.1 Finite Action Spaces

Any action is  $\epsilon'$ -dependent on itself since  $\sup \left\{ (f_{\rho_1} - f_{\rho_2})(a) : \sqrt{(f_{\rho_1} - f_{\rho_2})^2(a)} \leq \epsilon', \rho_1, \rho_2 \in \Theta \right\} \leq \epsilon'$ . Therefore, for all  $\epsilon > 0$ , the  $\epsilon$ -eluder dimension of  $\mathcal{A}$  is bounded by  $|\mathcal{A}|$ .

### D.2 Linear Case

**Proposition 6.** Suppose  $\Theta \subset \mathbb{R}^d$  and  $f_\theta(a) = \theta^T \phi(a)$ . Assume there exist constants  $\gamma$ , and  $S$ , such that for all  $a \in \mathcal{A}$  and  $\rho \in \Theta$ ,  $\|\rho\|_2 \leq S$ , and  $\|\phi(a)\|_2 \leq \gamma$ . Then  $\dim_E(\mathcal{F}, \epsilon) \leq 3d \frac{\epsilon}{\epsilon-1} \ln \left\{ 3 + 3 \left( \frac{2S}{\epsilon} \right)^2 \right\} + 1$ .

To simplify the notation, define  $w_k$  as in (14),  $\phi_k = \phi(a_k)$ ,  $\rho = \rho_1 - \rho_2$ , and  $\Phi_k = \sum_{i=1}^{k-1} \phi_i \phi_i^T$ . In this case,  $\sum_{i=1}^{k-1} (f_{\rho_1} - f_{\rho_2})^2(a_i) = \rho^T \Phi_k \rho$ , and by the triangle inequality  $\|\rho\|_2 \leq 2S$ . The proof follows by bounding the number of times  $w_k > \epsilon'$  can occur.

**Step 1:** If  $w_k \geq \epsilon'$  then  $\phi_k^T V_k^{-1} \phi_k \geq \frac{1}{2}$  where  $V_k := \Phi_k + \lambda I$  and  $\lambda = \left( \frac{\epsilon'}{2S} \right)^2$ .

*Proof.* We find  $w_k \leq \max \left\{ \rho^T \phi_k : \rho^T \Phi_k \rho \leq (\epsilon')^2, \rho^T I \rho \leq (2S)^2 \right\} \leq \max \left\{ \rho^T \phi_k : \rho^T V_k \rho \leq 2(\epsilon')^2 \right\} = \sqrt{2(\epsilon')^2} \|\phi_k\|_{V_k^{-1}}$ . The second inequality follows because any  $\rho$  that is feasible for the first maximization problem must satisfy  $\rho^T V_k \rho \leq (\epsilon')^2 + \lambda(2S)^2 = 2(\epsilon')^2$ . By this result,  $w_k \geq \epsilon'$  implies  $\|\phi_k\|_{V_k^{-1}}^2 \geq 1/2$ . □

**Step 2:** If  $w_i \geq \epsilon'$  for each  $i < k$  then  $\det V_k \geq \lambda^d \left( \frac{3}{2} \right)^{k-1}$  and  $\det V_k \leq \left( \frac{\gamma^2(k-1)}{d} + \lambda \right)^d$ .

*Proof.* Since  $V_k = V_{k-1} + \phi_k \phi_k^T$ , using the Matrix Determinant Lemma,

$$\det V_k = \det V_{k-1} \left( 1 + \phi_k^T V_{k-1}^{-1} \phi_k \right) \geq \det V_{k-1} \left( \frac{3}{2} \right) \geq \dots \geq \det [\lambda I] \left( \frac{3}{2} \right)^{k-1} = \lambda^d \left( \frac{3}{2} \right)^{k-1}.$$

Recall that  $\det V_k$  is the product of the eigenvalues of  $V_k$ , whereas  $\text{trace}[V_k]$  is the sum. As noted in [1],  $\det V_k$  is maximized when all eigenvalues are equal. This implies:  $\det V_k \leq \left( \frac{\text{trace}[V_k]}{d} \right)^d \leq \left( \frac{\gamma^2(k-1)}{d} + \lambda \right)^d$ . □

**Step 3:** Complete Proof

*Proof.* Manipulating the result of Step 2 shows  $k$  must satisfy the inequality:  $\left(\frac{3}{2}\right)^{\frac{k-1}{d}} \leq \alpha_0 \left[\frac{k-1}{d}\right] + 1$  where  $\alpha_0 = \left(\frac{\gamma^2}{\lambda}\right) = \left(\frac{2S\gamma}{\epsilon'}\right)^2$ . Let  $B(x, \alpha) = \max \left\{ B : (1+x)^B \leq \alpha B + 1 \right\}$ . The number of times  $w_k > \epsilon'$  can occur is bounded by  $dB(1/2, \alpha_0) + 1$ .

We now derive an explicit bound on  $B(x, \alpha)$  for any  $x \leq 1$ . Note that any  $B \geq 1$  must satisfy the inequality:  $\ln \{1+x\} B \leq \ln \{1+\alpha\} + \ln B$ . Since  $\ln \{1+x\} \geq x/(1+x)$ , using the transformation of variables  $y = B[x/(1+x)]$  gives:

$$y \leq \ln \{1+\alpha\} + \ln \frac{1+x}{x} + \ln y \leq \ln \{1+\alpha\} + \ln \frac{1+x}{x} + \frac{y}{e} \implies y \leq \frac{e}{e-1} \left( \ln \{1+\alpha\} + \ln \frac{1+x}{x} \right).$$

This implies  $B(x, \alpha) \leq \frac{1+x}{x} \frac{e}{e-1} (\ln \{1+\alpha\} + \ln \frac{1+x}{x})$ . The claim follows by plugging in  $\alpha = \alpha_0$  and  $x = 1/2$ .  $\square$

### D.3 Generalized Linear Models

**Proposition 7.** Suppose  $\Theta \subset \mathbb{R}^d$  and  $f_\theta(a) = g(\theta^T \phi(a))$  where  $g(\cdot)$  is a differentiable and strictly increasing function. Assume there exist constants  $\underline{h}$ ,  $\bar{h}$ ,  $\gamma$ , and  $S$ , such that for all  $a \in \mathcal{A}$  and  $\rho \in \Theta$ ,  $0 < \underline{h} \leq g'(\rho^T \phi(a)) \leq \bar{h}$ ,  $\|\rho\|_2 \leq S$ , and  $\|\phi(a)\|_2 \leq \gamma$ . Then  $\dim_E(\mathcal{F}, \epsilon) \leq 3dr^2 \frac{e}{e-1} \ln \left\{ 3r^2 + 3r^2 \left( \frac{2S\bar{h}}{\epsilon} \right)^2 \right\} + 1$ .

The proof follows three steps which closely mirror those used to prove Proposition 6.

**Step 1:** If  $w_k \geq \epsilon'$  then  $\phi_k^T V_k^{-1} \phi_k \geq \frac{1}{2r^2}$  where  $V_k := \Phi_k + \lambda I$  and  $\lambda = \left( \frac{\epsilon'}{2S\underline{h}} \right)^2$ .

*Proof.* By definition  $w_k \leq \max \left\{ g(\rho^T \phi_k) : \sum_{i=1}^{k-1} g(\rho^T \phi(a_i))^2 \leq (\epsilon')^2, \rho^T I \rho \leq (2S)^2 \right\}$ . By the uniform bound on  $g'(\cdot)$  this is less than  $\max \left\{ \bar{h} \rho^T \phi_k : \underline{h}^2 \rho^T \Phi_k \rho \leq (\epsilon')^2, \rho^T I \rho \leq (2S)^2 \right\} \leq \max \left\{ \bar{h} \rho^T \phi_k : \underline{h}^2 \rho^T V_k \rho \leq 2(\epsilon')^2 \right\} = \sqrt{2(\epsilon')^2 / r^2} \|\phi_k\|_{V_k^{-1}}$ .  $\square$

**Step 2:** If  $w_i \geq \epsilon'$  for each  $i < k$  then  $\det V_k \geq \lambda^d \left(\frac{3}{2}\right)^{k-1}$  and  $\det V_k \leq \left( \frac{\gamma^2(k-1)}{d} + \lambda \right)^d$ .

**Step 3:** Complete Proof

*Proof.* The above inequalities imply  $k$  must satisfy:  $\left(1 + \frac{1}{2r^2}\right)^{\frac{k-1}{d}} \leq \alpha_0 \left[\frac{k-1}{d}\right]$  where  $\alpha_0 = \gamma^2/\lambda$ . Therefore, as in the linear case, the number of times  $w_k > \epsilon'$  can occur is bounded by  $dB(\frac{1}{2r^2}, \alpha_0) + 1$ . Plugging these constants into the earlier bound  $B(x, \alpha) \leq \frac{1+x}{x} \frac{e}{e-1} (\ln \{1+\alpha\} + \ln \frac{1+x}{x})$  and using  $1+x \leq 3/2$  yields the result.  $\square$
